# Supplementary material
Source: Elsevier journal article supplement (https://www.sciencedirect.com/science/article/pii/S188558571630425X)
Supplement: mmc1 [file S188558571630425X:mmc1.pdf]

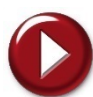

## Supplementary material

# Current and Future Percutaneous Strategies for the Treatment of Acute and Chronic Heart Failure

**Table 1 of the Supplementary Material.**

Suggested Indications for Percutaneous Mechanical Circulatory Support

| Indication*                                                               | Comments                                                                                                                                                           |
|---------------------------------------------------------------------------|--------------------------------------------------------------------------------------------------------------------------------------------------------------------|
| Complication of AMI                                                       | Acute mitral regurgitation, severe acute LV depression, cardiogenic shock due to RV AMI                                                                            |
| Severe heart failure in the setting of nonischemic cardiomyopathy         | Exacerbations of chronic systolic heart failure<br><br>Acute reversible cardiomyopathies such as myocarditis, Tako-tsubo cardiomyopathy, peripartum cardiomyopathy |
| Acute cardiac allograft failure                                           | Primary allograft failure                                                                                                                                          |
| Posttransplant RV failure                                                 | Provides time for the donor RV to recover function if there is recipient pulmonary hypertension                                                                    |
| Patients slow to wean from cardiopulmonary bypass following heart surgery | Percutaneous systems rarely used in this setting                                                                                                                   |
| Refractory arrhythmias                                                    | MCS devices independent of cardiac rhythm                                                                                                                          |

|                                                          |                                                                            |
|----------------------------------------------------------|----------------------------------------------------------------------------|
| Prophylactic use for high-risk PCI                       | In patients with severe LV dysfunction and complex coronary artery disease |
| High-risk or complex ablation of ventricular tachycardia | Allow the patient to remain in VT longer during arrhythmia mapping         |
| High-risk percutaneous valve interventions               | New potential use                                                          |

AMI, acute myocardial infarction; LV, left ventricle; MCS, mechanical circulatory support; PCI, percutaneous coronary intervention; RV, right ventricle; VT, ventricular tachycardia.

\*Modified from Rihal CS, Naidu SS, Givertz MM, et al. 2015 SCAI/ACC/HFSA/STS Clinical Expert Consensus Statement on the Use of Percutaneous Mechanical Circulatory Support Devices in Cardiovascular Care (Endorsed by the American Heart Association, the Cardiological Society of India, and *Sociedad Latino Americana de Cardiologia Intervencion*; Affirmation of Value by the Canadian Association of Interventional Cardiology–*Association Canadienne de Cardiologie d'intervention*). *Catheter Cardiovasc Interv*. 2015;85:175–196.
